# Supplementary material
Source: publisher site journal article supplement (https://www.dovepress.com/get_supplementary_file.php?f=425640.docx)
Supplement: Supplementary file 1 [file get_supplementary_file.php]

**Supplementary material 1**

**Interview guide**

***In consultations with persons with hand ailment***

- Examples of questions:
  - How would you describe a typical consultation with a patient with hand ailment?
  - What types of challenges/concerns do hand OA patients present to you?
  - How do you respond to those concerns?

***Tasks and responsibilities***

- Examples of questions:
- What professional tasks do you do in encounters with persons with hand ailment?
- What are your professional responsibilities in addressing needs of persons with suspected or confirmed hand OA?
- How did your tasks/responsibilities related to hand OA change since you started working in the hospital?
- In what ways have you influenced those potential changes?
- In your opinion, how does potential changes in professional tasks and responsibilities influence patients?

***Interprofessional collaboration***

- Examples of questions:
  - Who do you collaborate with regarding patients with hand OA?
  - Can you say something about how that collaboration plays out in your daily work?
  - What do you think other professional groups contribute with towards this patient group?
  - Do you have examples of tasks that have been shifted and carried out by other professionals?

***Knowledge and experience***

- Examples of questions:
  - Where are the insights/skills you have about hand OA originating from?
  - What insights/skills do you find important in addressing the needs of persons with hand OA?
  - How do you stay updated on new developments in hand OA?
